# Supplementary material for: Ulva pertusa, a Marine Green Alga, Attenuates DNBS-Induced Colitis Damage via NF-κB/Nrf2/SIRT1 Signaling Pathways
Source: MDPI journal article supplement (doi:10.3390/jcm11154301), 2022-07-25
Supplement: s1 [file s1]

**Table S1.** Composition of the macronutrients present in the *Ulva Pertusa* extract

|                                                                  | <b>CARBOHYDRATE</b> | <b>PROTEIN</b> | <b>LIPID</b> | <b>ASH</b> |
|------------------------------------------------------------------|---------------------|----------------|--------------|------------|
| <i>Ulva Pertusa</i> extract<br>Composition<br>(100 g dry weight) | 50%                 | 25%            | 5%           | 20%        |

**Table S2.** Carbohydrate quali-quantitative composition of *Ulva Pertusa* extract

| <b>CARBOHYDRATE</b> | <i>Ulva Pertusa</i> extract Composition<br>(100 g dry weight) |
|---------------------|---------------------------------------------------------------|
| Rhamnose            | 14.0%                                                         |
| Xylose              | 6.5%                                                          |
| Glucose             | 4.0%                                                          |
| Mannose             | 1.0%                                                          |
| Arabinose           | 0.5%                                                          |
| Galactose           | 0.5%                                                          |
| Uronic Acids        | 23.2%                                                         |
| Sulfate             | 17.5%                                                         |
| Nitrogen            | 1.0%                                                          |

**Table S3.** Protein quali-quantitative composition of *Ulva Pertusa* extract

| <b>Amino acid</b> | <i>Ulva Pertusa</i> extract Composition<br>(g/100 g dry weight) |
|-------------------|-----------------------------------------------------------------|
| Aspartic acid     | 3.10                                                            |
| Serine            | 1.67                                                            |
| Glutamic acid     | 2.33                                                            |
| Glycine           | 1.60                                                            |
| Histidine         | 0.30                                                            |
| Arginine          | 1.40                                                            |
| Threonine         | 1.40                                                            |

|               |      |
|---------------|------|
| Alanine       | 2.55 |
| Proline       | 0.99 |
| Tyrosine      | 0.66 |
| Valine        | 1.6  |
| Lysine        | 1.05 |
| Isoleucine    | 0.91 |
| Leucine       | 1.77 |
| Phenylalanine | 1.35 |

**Table S4.** Lipid quali-quantitative composition of *Ulva Pertusa* extract

| <b>LIPID</b>              | <i>Ulva Pertusa</i> extract Composition<br>(100 g dry weight) |
|---------------------------|---------------------------------------------------------------|
| <b><i>Saturated</i></b>   |                                                               |
| 14:0                      | 2.91%                                                         |
| 16:0                      | 22.3%                                                         |
| 18:0                      | 0.5%                                                          |
|                           |                                                               |
| <b><i>Unsaturated</i></b> |                                                               |
| 16:1                      | 3.23%                                                         |
| 18:1                      | 10.14%                                                        |
| 18:2 n - 6                | 2.11%                                                         |
| 18:3 n - 3                | 12.5%                                                         |
| 16:4 n - 3                | 10.9%                                                         |
| 18:4 n - 3                | 15.51%                                                        |
| 20:5 n - 6                | 1.46%                                                         |
| 22:6 n - 3                | 1.11%                                                         |
